# Supplementary material for: Moderate Salinity Stress Affects Rice Quality by Influencing Expression of Amylose- and Protein-Content-Associated Genes
Source: MDPI journal article supplement (doi:10.3390/ijms25074042), 2024-04-05
Supplement: s1 [file s1]

**Table S 1. Primers used for qRT-PCR of the genes used in this paper**

| <b>Primer name</b> | <b>Sequence (5'-3')</b>   |
|--------------------|---------------------------|
| eEF-1 $\alpha$ F   | TTTCACTCTTGGTGTGAAGCAGAT  |
| eEF-1 $\alpha$ R   | GACTTCCTTCACGATTTCATCGTAA |
| qOsNF-YB1F         | GAATATAGCGGCTCATCACC      |
| qOsNF-YB1R         | CACACACACATGCATCAAGTT     |
| qWxF               | ACCTGACACTGGAGTTGATTAC    |
| qWxR               | GTATGGGTTGTTGTTGAGGTTTAG  |
| qChalk5F           | TCCTTCACCCCTCTTCGACTT     |
| qChalk5R           | GTGACGTAGCCTATCACCAATC    |
| qOsAAP6            | CAAGCGGAACCTACACCTACAT    |
| qOsAAP6            | CCCAGAGAATCGCGTACTG       |
| qOsGluA2F          | TGCTTGTTCCCTCTTGTGCGA     |
| qOsGluA2R          | TATGGCAACAACCGGCACTT      |
| qWCR1F             | CAGCCCATTCAGCCTCTTGCA     |
| qWCR1R             | CGGATTACCTCGACGAGCTC      |
